# Supplementary material
Source: PubMed Central journal article supplement (PMC5048352)
Supplement: EMBJ-35-2139-s001.pdf [file EMBJ-35-2139-s001.pdf]

# Expanded View Figures

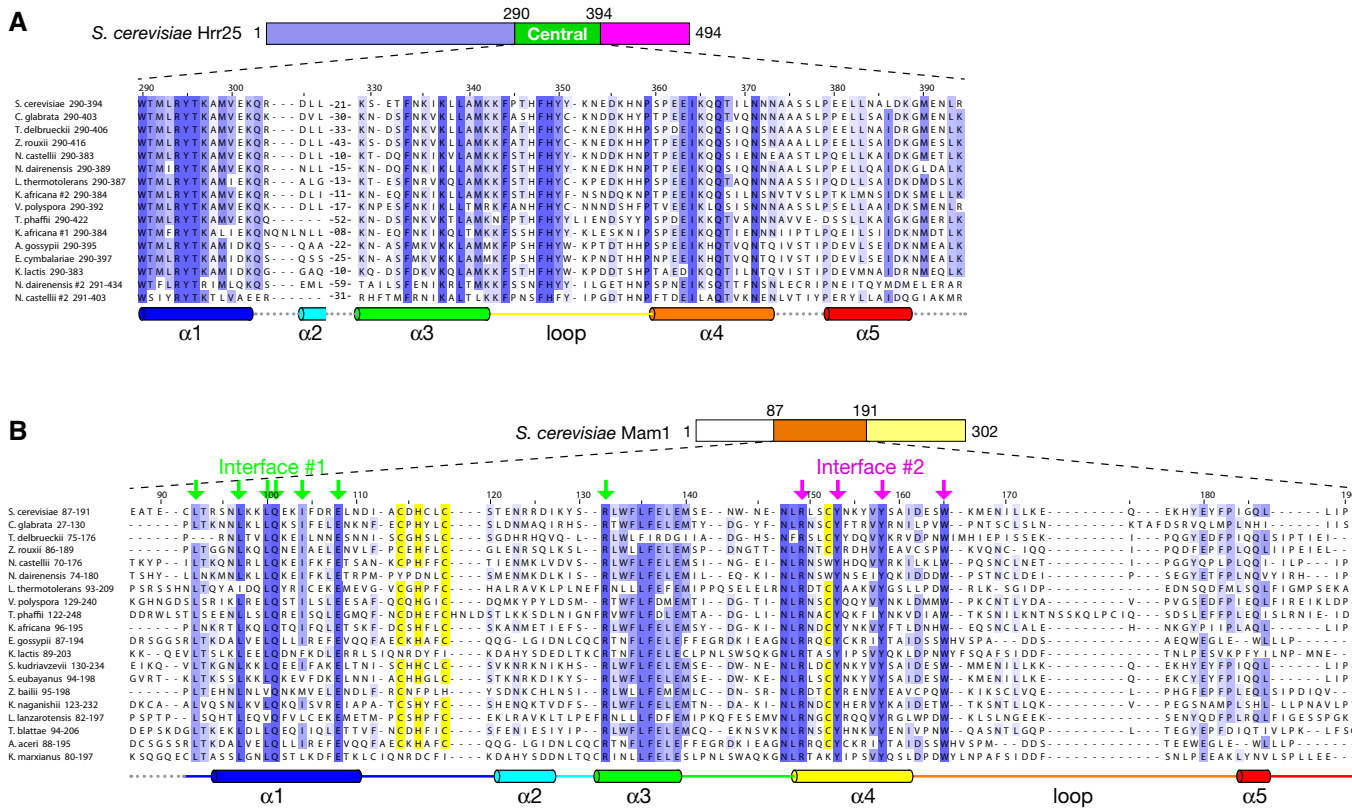

**Figure EV1. Sequence alignments of the Hrr25 central domain and the Hrr25-binding region of Mam1.**

- A Sequence alignment of the Hrr25 central domain from the Saccharomycotina fungi (green branches in Fig 1B).
- B Sequence alignment of the Mam1–Hrr25-binding region from the same set of Saccharomycotina fungi. Shown in yellow are conserved zinc-coordinating cysteine and histidine residues (see Fig 4). Green and magenta arrows mark residues involved in Hrr25 interfaces #1 and #2, respectively (see Fig 5).

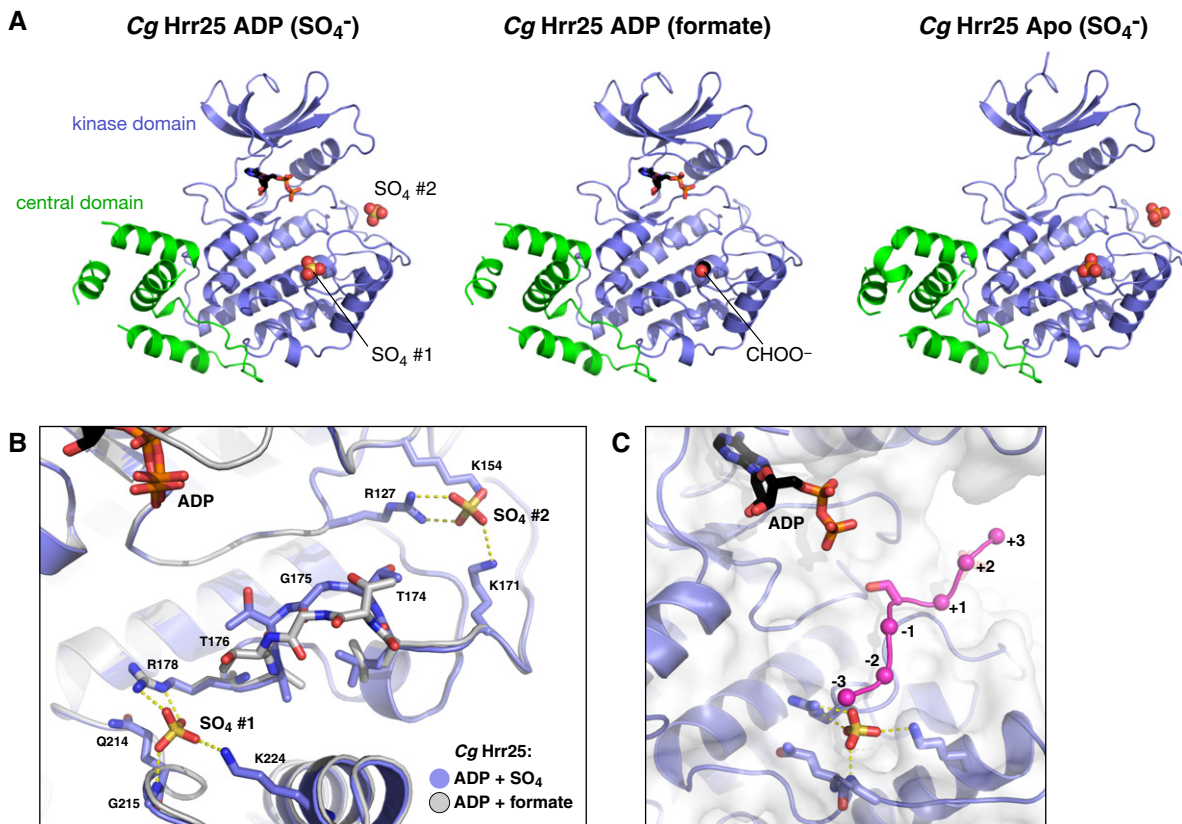

**Figure EV2. PO<sub>4</sub><sup>-</sup> binding sites in Hrr25.**

A Aligned structures of *Candida glabrata* Hrr25<sup>1-403</sup> crystallized without nucleotide (Apo, left), or in the presence of ADP in crystallization buffer with formate (center) or sulfate (SO<sub>4</sub><sup>-</sup>, right). PO<sub>4</sub><sup>-</sup>/SO<sub>4</sub><sup>-</sup> ions bound to sites 1 and 2 are shown as spheres. In the ADP (formate) structure, there is no ion bound to site 2, but a formate ion (CHOO<sup>-</sup>) is observed at site 1.

B Close-up view of PO<sub>4</sub><sup>-</sup> binding sites S1 and S2 in *C. glabrata* Hrr25 (blue), overlaid with the formate-bound structure (white).

C View of the *C. glabrata* Hrr25 active site and SO<sub>4</sub><sup>-</sup> at S1, with modeled substrate peptide from a Cdk2:cyclin A:peptide complex (PDB ID 1GY3) (Cook et al, 2002).

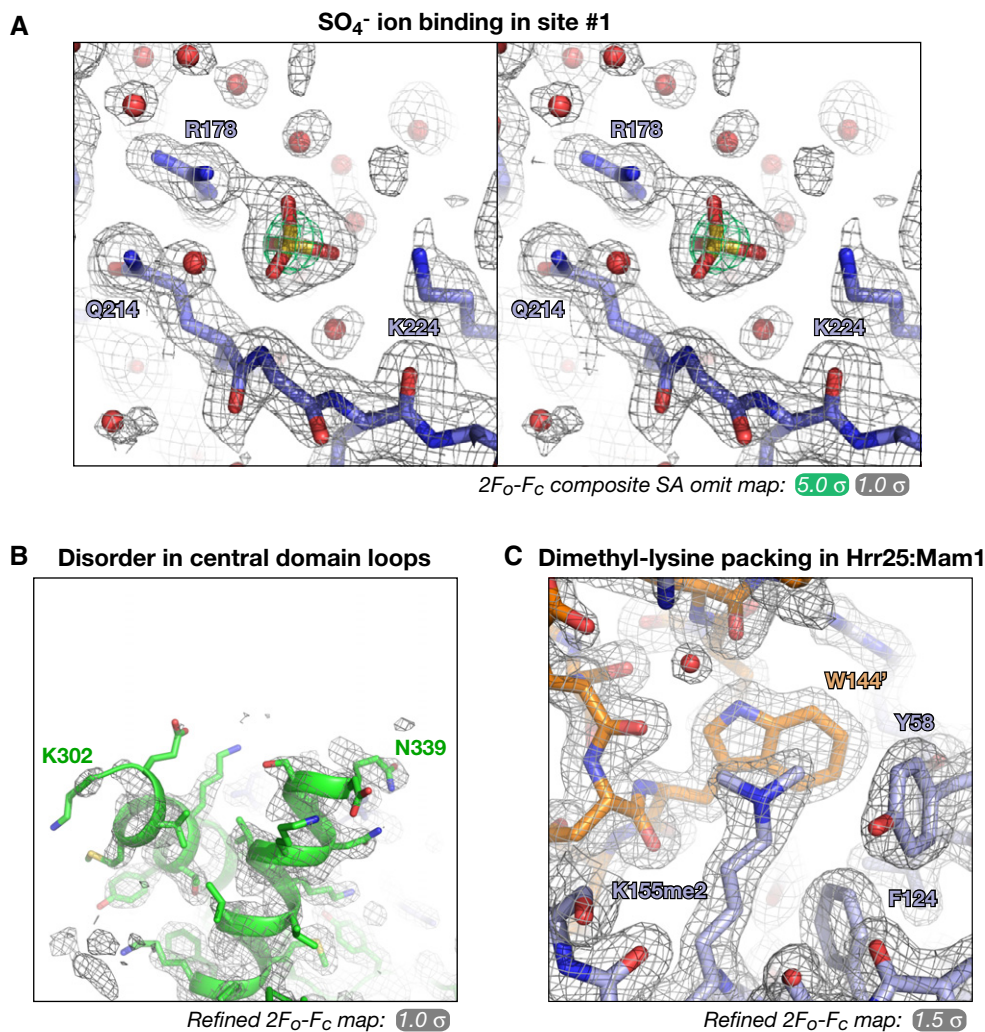

**Figure EV3. Representative electron density maps.**

- A Stereo view of a  $2F_o-F_c$  simulated-annealing composite all-omit map from the *Candida glabrata* Hrr25<sup>1-403</sup>-ADP complex (2.0 Å resolution), showing the sulfate ion bound to site #1.
- B Refined  $2F_o-F_c$  electron density for the  $\alpha 1$ - $\alpha 3$  segment ( $\alpha 2$  is disordered in this structure) Hrr25 central domain in the *C. glabrata* Hrr25<sup>1-403</sup>-ADP complex (2.0 Å resolution).
- C Example crystal packing interaction mediated by dimethylated surface lysine residues in the structures of *S. cerevisiae* Hrr25<sup>1-394</sup> K38R:Mam1<sup>87-191</sup>. Here, dimethylated Hrr25 Lys155 (foreground; blue) forms a hydrophobic packing interaction with a symmetry-related Mam1 Trp144 (background; orange). Refined  $2F_o-F_c$  electron density is shown at 1.5  $\sigma$ .

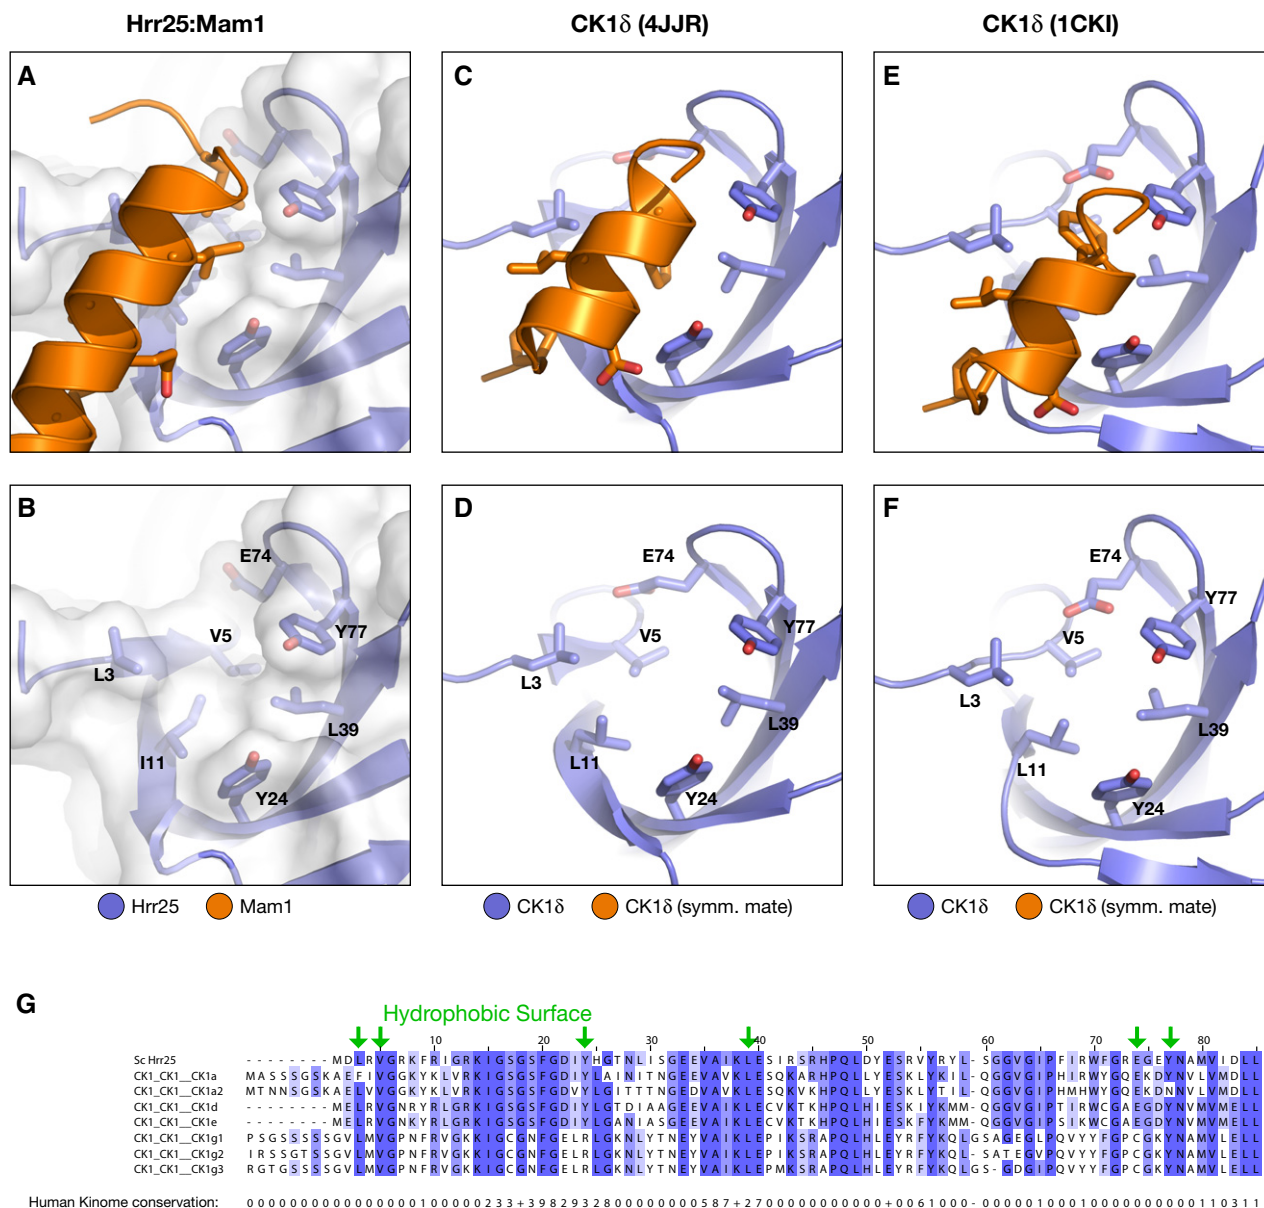

**Figure EV4. Conservation of N-lobe hydrophobic surface in CK1-family kinases.**

A–F Views of the kinase domain N-lobes of Hrr25 (A, B), human CK1δ in PDB 4JJR (C, D) (Zeringo *et al*, 2013), and human CK1δ in PDB 1CKI (E, F) (Longenecker *et al*, 1996). Upper panels show kinase domain (blue) with conserved hydrophobic surface residues in stick view and bound  $\alpha$ -helix from Mam1 (A) or a symmetry-related copy of CK1δ (C, E) in orange. Lower panels are missing bound partner for clarity, with conserved hydrophobic surface residues labeled.

G Sequence alignment of the Hrr25 N-lobe with all human CK1-family kinases. At bottom is shown the conservation score (1–10, “+” indicates a score of 10) calculated by Jalview from an alignment of the entire human kinome (downloaded from <http://kinase.com>) plus Hrr25. Hydrophobic surface residues are shown with green arrows; most of these residues are highly conserved within CK1-family kinases but poorly conserved in kinases as a whole.

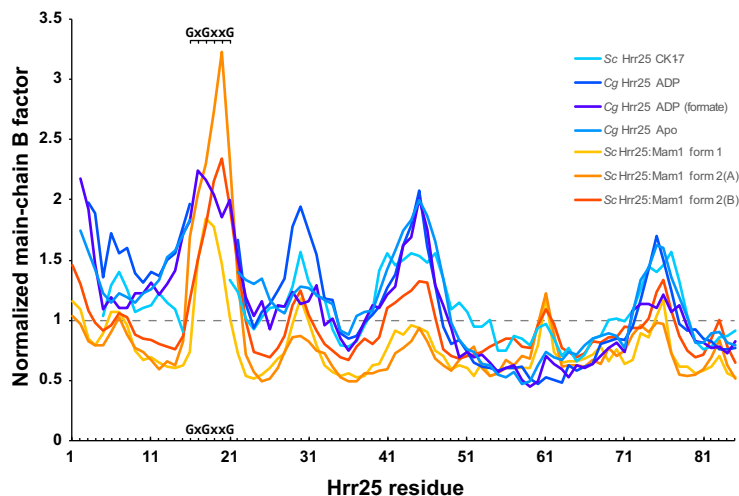

**Figure EV5. N-lobe B-factors for Hrr25 and Hrr25:Mam1 structures.** Residue-by-residue plot of main-chain B-factors from four structures of Hrr25 and three crystallographically unique views of Hrr25:Mam1. Values are normalized as in Fig 6D, with the average B-factor for the entire Hrr25 chain adjusted to 1.0. Values calculated with BAVERAGE (Winn et al, 2011). GxGxxG indicates the glycine-rich loop (residues 16–21 in both *Saccharomyces cerevisiae* and *Candida glabrata* Hrr25) that drapes over a bound nucleotide. This motif is well ordered in all three views of Hrr25:Mam1, but only one of the four structures of Hrr25. Because the GxGxxG motif was disordered in three of four Hrr25-alone structures and was therefore not included in the analysis in Fig 6D, that analysis likely underestimates the stabilizing effect of Mam1 on Hrr25 structure.

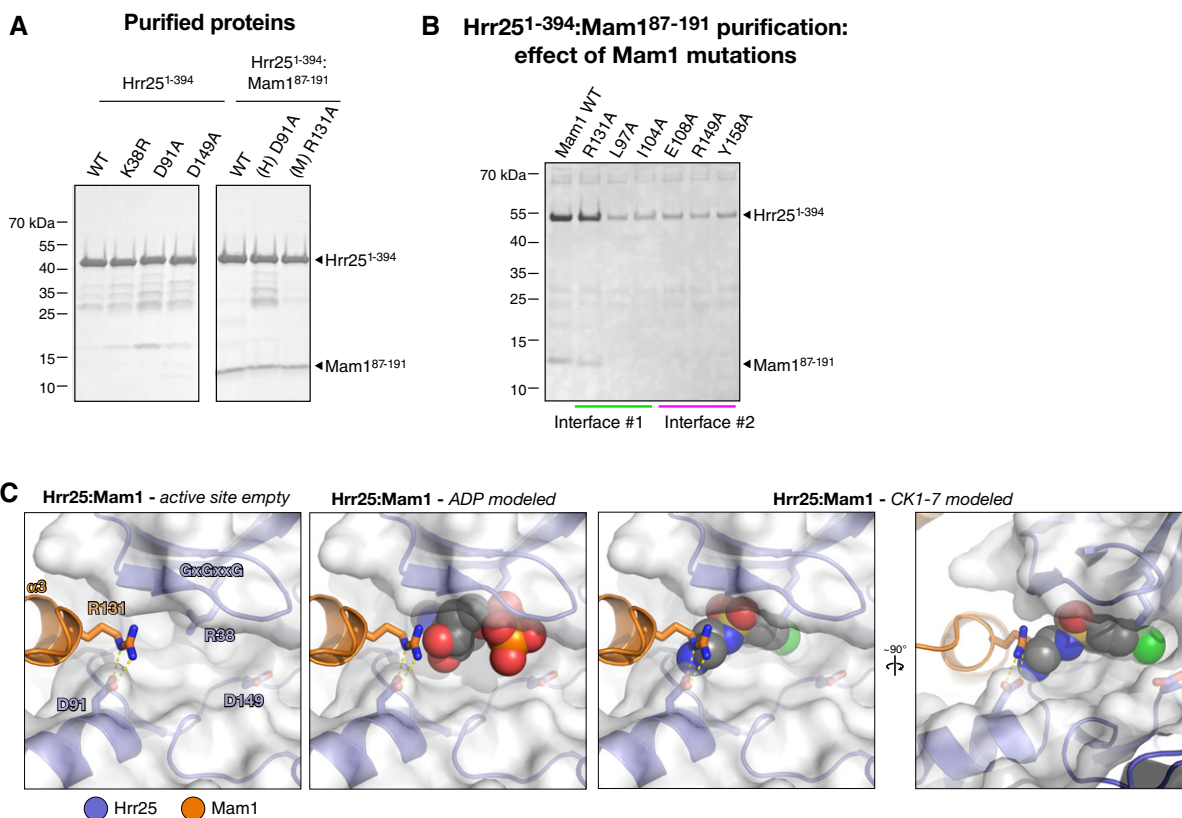

**Figure EV6. Purification of Hrr25 and Hrr25:Mam1 for ATPase assays and modeling of Mam1 Arg131 interaction with nucleotide and CK1-7.**

A SDS-PAGE analysis of purified *Saccharomyces cerevisiae* Hrr25<sup>1-394</sup> and Hrr25<sup>1-394</sup>;Mam1<sup>87-191</sup> complexes used for ATPase assays.  
 B Ni<sup>2+</sup> affinity pull-down of co-expressed His<sub>6</sub>-Hrr25<sup>1-394</sup> K38R:Mam1<sup>87-191</sup> complexes with mutations to Mam1 in interfaces #1 or #2. Except for R131A, all mutations result in a loss of co-purification of Mam1, indicating a loss of binding, and a significant reduction in the level of soluble Hrr25<sup>1-394</sup> K38R.  
 C Close-up views of the Hrr25 active site in the structure of *S. cerevisiae* Hrr25<sup>1-394</sup>;Mam1<sup>87-191</sup>. Mam1 R131 extends toward the ATP-binding pocket, and while it would not clash with a bound nucleotide (center panel), it would clash with the aminoethyl group of bound CK1-7 (right panels).
